# Supplementary material
Source: PubMed Central journal article supplement (PMC9857661)

## Supplemental Online Content

Pandey A, Kitzman DW, Nelson MB, et al. Frailty and effects of a multidomain physical rehabilitation intervention among older patients hospitalized for acute heart failure: a secondary analysis of a randomized clinical trial. *JAMA Cardiol*. Published online January 4, 2023. doi:10.1001/jamacardio.2022.4903

**eTable 1.** Baseline Characteristics of Study Participants Across the Treatment vs Attention Control Arms Across the Prefrail vs Frail Strata

**eTable 2.** Association of Decrease in Evidence of Frailty, Assessed Per 1-Unit Decrease in Modified Fried Frailty Criteria, From Baseline to 3-Month Follow-up With Risk of Adverse Clinical Events at 6-Month Follow-up

**eFigure 1.** CONSORT Diagram for the Primary Trial

**eFigure 2.** CONSORT diagram for the present analysis

**eFigure 3.** Adjusted Measures of EuroQol Score, MoCA Score, and Global Depression Scale Score at 3-Month Follow-up

**eFigure 4.** Proportion of Participants Meeting Key Components of Fried Criteria at Baseline and 3-Month Follow-up Among Rehabilitation Intervention and Attention Control Arms

This supplementary material has been provided by the authors to give readers additional information about their work.

**eTable 1.** Baseline Characteristics of Study Participants Across the Treatment vs Attention Control Arms Across the Prefrail vs Frail Strata

| Characteristics                                                                                                                                                                                                                                                                                                                                                                                                                       | Pre-Frail<br>(N=145) | Frail<br>(N=192) | p-value |
|---------------------------------------------------------------------------------------------------------------------------------------------------------------------------------------------------------------------------------------------------------------------------------------------------------------------------------------------------------------------------------------------------------------------------------------|----------------------|------------------|---------|
| Age                                                                                                                                                                                                                                                                                                                                                                                                                                   | 71.7 ± 7.6           | 73.5 ± 8.3       | 0.041   |
| Female                                                                                                                                                                                                                                                                                                                                                                                                                                | 72 (50%)             | 109 (57%)        | 0.19    |
| Non-white                                                                                                                                                                                                                                                                                                                                                                                                                             | 78 (54%)             | 89 (46%)         | 0.18    |
| Body mass index (kg/m <sup>2</sup> )                                                                                                                                                                                                                                                                                                                                                                                                  | 32.5 ± 7.4           | 33.4 ± 9.4       | 0.33    |
| Ejection fraction ≥45%                                                                                                                                                                                                                                                                                                                                                                                                                | 72 (50%)             | 109 (57%)        | 0.19    |
| NYHA Class                                                                                                                                                                                                                                                                                                                                                                                                                            |                      |                  |         |
| II                                                                                                                                                                                                                                                                                                                                                                                                                                    | 28 (19%)             | 33 (18%)         | 0.67    |
| III                                                                                                                                                                                                                                                                                                                                                                                                                                   | 81 (56%)             | 102 (53%)        |         |
| IV                                                                                                                                                                                                                                                                                                                                                                                                                                    | 36 (25%)             | 56 (29%)         |         |
| BNP, pg/mL, median (IQR)                                                                                                                                                                                                                                                                                                                                                                                                              | 595 (302-1033)       | 625 (300-1297)   | 0.44    |
| NT-proBNP, pg/mL, median (IQR)                                                                                                                                                                                                                                                                                                                                                                                                        | 3387 (1622-5254)     | 3131 (1452-8351) | 0.56    |
| Length of stay, median (IQR)                                                                                                                                                                                                                                                                                                                                                                                                          | 4 (3-6)              | 5 (3-7)          | 0.13    |
| <b>Co-morbidities</b>                                                                                                                                                                                                                                                                                                                                                                                                                 |                      |                  |         |
| Total Comorbidities                                                                                                                                                                                                                                                                                                                                                                                                                   | 4.9 ± 1.7            | 5.5 ± 2.1        | 0.003   |
| Hypertension                                                                                                                                                                                                                                                                                                                                                                                                                          | 134 (92%)            | 175 (91%)        | 0.68    |
| Myocardial infarction                                                                                                                                                                                                                                                                                                                                                                                                                 | 26 (18%)             | 34 (18%)         | 0.96    |
| Coronary revascularization                                                                                                                                                                                                                                                                                                                                                                                                            | 40 (28%)             | 59 (31%)         | 0.53    |
| Atrial fibrillation                                                                                                                                                                                                                                                                                                                                                                                                                   | 64 (44%)             | 105 (55%)        | 0.06    |
| Diabetes mellitus                                                                                                                                                                                                                                                                                                                                                                                                                     | 76 (52%)             | 101 (53%)        | 0.97    |
| Hyperlipidemia                                                                                                                                                                                                                                                                                                                                                                                                                        | 98 (68%)             | 125 (65%)        | 0.63    |
| Chronic obstructive pulmonary disease                                                                                                                                                                                                                                                                                                                                                                                                 | 30 (21%)             | 65 (34%)         | 0.008   |
| Chronic kidney disease                                                                                                                                                                                                                                                                                                                                                                                                                | 39 (27%)             | 75 (39%)         | 0.019   |
| Stroke                                                                                                                                                                                                                                                                                                                                                                                                                                | 23 (16%)             | 28 (15%)         | 0.75    |
| Peripheral vascular disease                                                                                                                                                                                                                                                                                                                                                                                                           | 13 (9%)              | 27 (14%)         | 0.15    |
| Cancer                                                                                                                                                                                                                                                                                                                                                                                                                                | 24 (17%)             | 48 (25%)         | 0.06    |
| <b>Geriatric Conditions</b>                                                                                                                                                                                                                                                                                                                                                                                                           |                      |                  |         |
| Urinary incontinence*                                                                                                                                                                                                                                                                                                                                                                                                                 | 11 (9%)              | 27 (17%)         | 0.06    |
| Fall in previous 3 months†                                                                                                                                                                                                                                                                                                                                                                                                            | 18 (15%)             | 25 (16%)         | 0.87    |
| MoCA Score <26                                                                                                                                                                                                                                                                                                                                                                                                                        | 108 (75%)            | 158 (82%)        | 0.08    |
| GDS-15 Score ≥5                                                                                                                                                                                                                                                                                                                                                                                                                       | 50 (34%)             | 100 (52%)        | 0.001   |
| <b>Functional Status/QOL measures at baseline</b>                                                                                                                                                                                                                                                                                                                                                                                     |                      |                  |         |
| SPPB Score                                                                                                                                                                                                                                                                                                                                                                                                                            | 7.0±2.6              | 5.1±2.4          | <0.001  |
| Balance Score                                                                                                                                                                                                                                                                                                                                                                                                                         | 2.9±1.3              | 2.4±1.3          | <0.001  |
| 4-meter Walk Score                                                                                                                                                                                                                                                                                                                                                                                                                    | 2.7±1.0              | 1.9±0.8          | <0.001  |
| Chair Rise Score                                                                                                                                                                                                                                                                                                                                                                                                                      | 1.4±1.2              | 0.9±1.0          | <0.001  |
| 6 Minute Walk Distance (m)                                                                                                                                                                                                                                                                                                                                                                                                            | 225±105              | 158±89           | <0.001  |
| KCCQ Overall Score                                                                                                                                                                                                                                                                                                                                                                                                                    | 46±21                | 35±18            | <0.001  |
| EuroQol VAS                                                                                                                                                                                                                                                                                                                                                                                                                           | 63±19                | 54±23            | <0.001  |
| Data presented as mean ± SD or median (25 <sup>th</sup> and 75 <sup>th</sup> percentile) for continuous variable and n (%) for categorical variables. Abbreviations: NT-ProBNP- N-terminal brain natriuretic peptide; BNP- Brain natriuretic peptide; SPPB- short physical performance battery; KCCQ- Kansas City cardiomyopathy questionnaire, MoCA Score- Montreal cognitive assessment score; GDS-15- Geriatric depression scale-1 |                      |                  |         |

**eTable 2.** Association of Decrease in Evidence of Frailty, Assessed Per 1-Unit Decrease in Modified Fried Frailty Criteria, From Baseline to 3-Month Follow-up With Risk of Adverse Clinical Events at 6-Month Follow-up

| Outcomes                                                                                                                                                                                                                                                                                                                                                                                                                                     | Rehabilitation Intervention arm |         | Attention Control Arm       |         |
|----------------------------------------------------------------------------------------------------------------------------------------------------------------------------------------------------------------------------------------------------------------------------------------------------------------------------------------------------------------------------------------------------------------------------------------------|---------------------------------|---------|-----------------------------|---------|
|                                                                                                                                                                                                                                                                                                                                                                                                                                              | Parameter Estimate (95% CI)     | p-value | Parameter Estimate (95% CI) | p-value |
| All-cause rehospitalizations                                                                                                                                                                                                                                                                                                                                                                                                                 | 0.65 (0.52-0.80)                | <0.001  | 0.66 (0.52-0.83),           | p<0.001 |
| Combined all-cause rehospitalizations and death                                                                                                                                                                                                                                                                                                                                                                                              | 0.62 (0.50-0.76)                | <0.001  | 0.64 (0.51-0.80)            | p<0.001 |
| <p>Models adjusted for age, sex, clinical site, EF category. Parameter estimates were for 1 unit decrease in change in modified Fried frailty index score from baseline 95%CI. Separate models were constructed for each outcome.</p> <p>Abbreviations: SPPB- short physical performance battery; KCCQ- Kansas City cardiomyopathy questionnaire, MoCA Score- Montreal cognitive assessment score; GDS-15- Geriatric depression scale-15</p> |                                 |         |                             |         |

**eFigure 1.** CONSORT Diagram for the Primary Trial

(Adapted from the primary trial publication, Kitzman et al NEJM 2021)

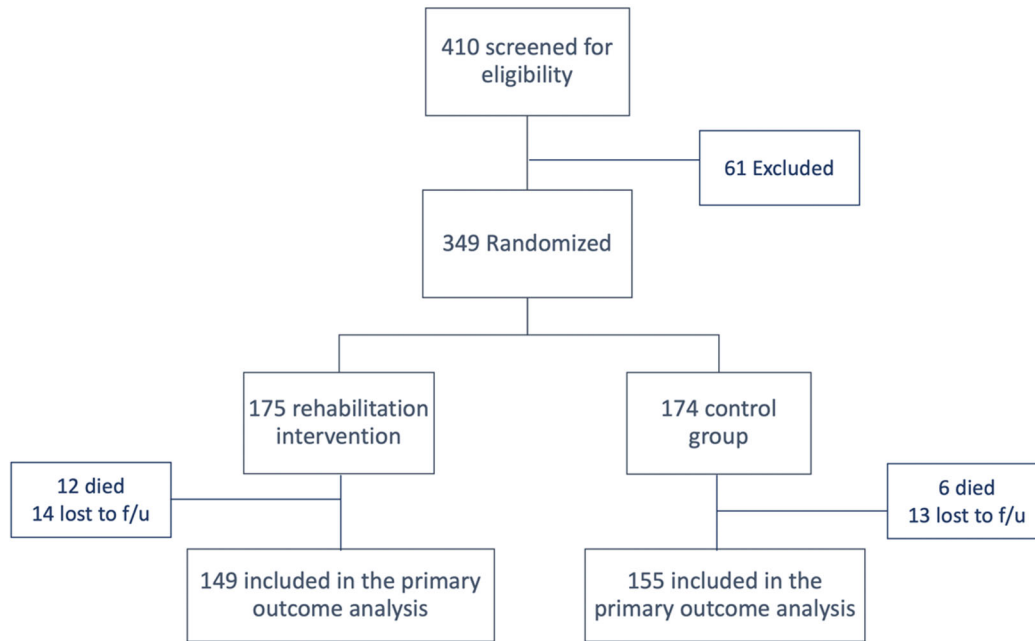

**eFigure 2.** CONSORT diagram for the present analysis

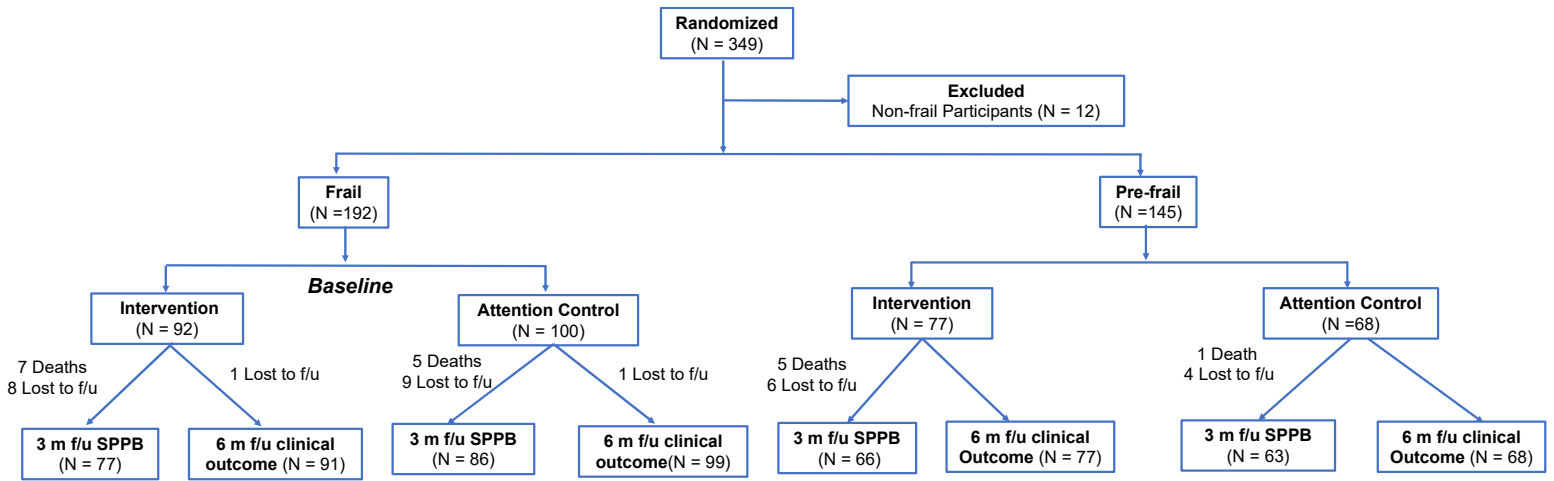

**eFigure 3.** Adjusted Measures of EuroQol Score, MoCA Score, and Global Depression Scale Score at 3-Month Follow-up

Adjusted measures of EuroQol score (range from 0-100 with a higher score indicating better QOL), MoCA score (range from 0-30 with a higher score indicating better cognition), and Global depression scale (GDS-15, range from 0-15 with a higher score indicating worse depressive symptoms) score at 3 months follow up among intervention and attention control group participants stratified by frail (vs. prefrail) status at baseline. Follow-up data are presented as LS means  $\pm$  SE adjusted for baseline value, clinical site, age, sex, and EF category. Effect size represents the difference in LS means between the intervention and attention control groups. P-interaction refers to treatment arm\*frailty status (prefrail vs. frail) interaction for the outcome of interest.

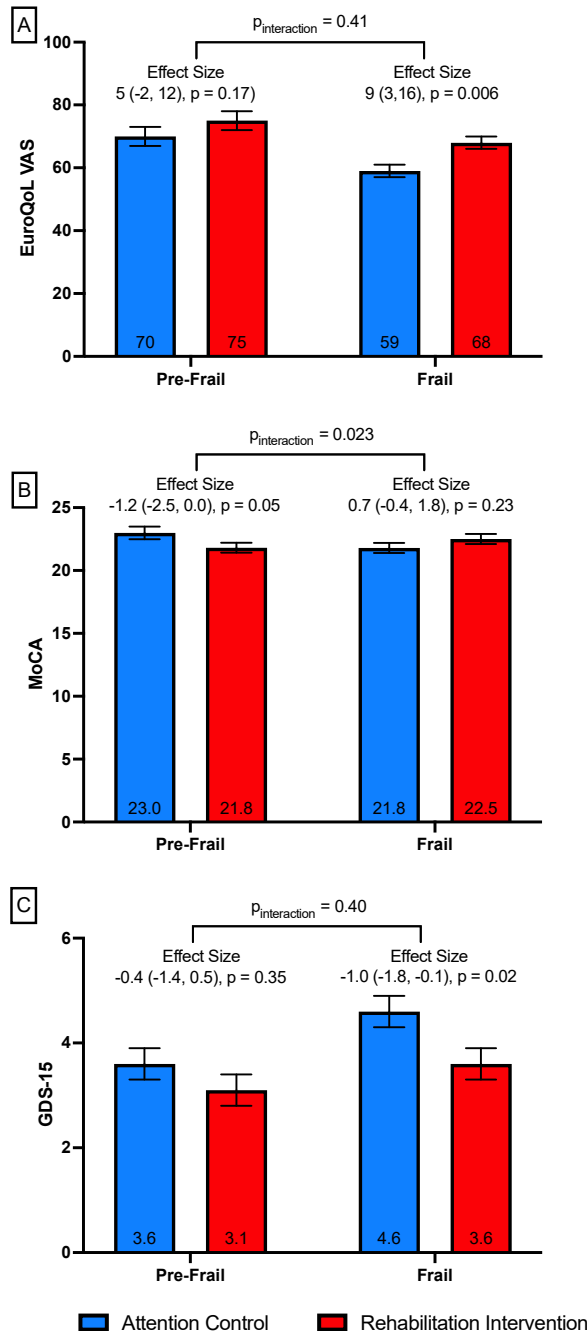

**eFigure 4.** Proportion of Participants Meeting Key Components of Fried Criteria at Baseline and 3-Month Follow-up Among Rehabilitation Intervention and Attention Control Arms

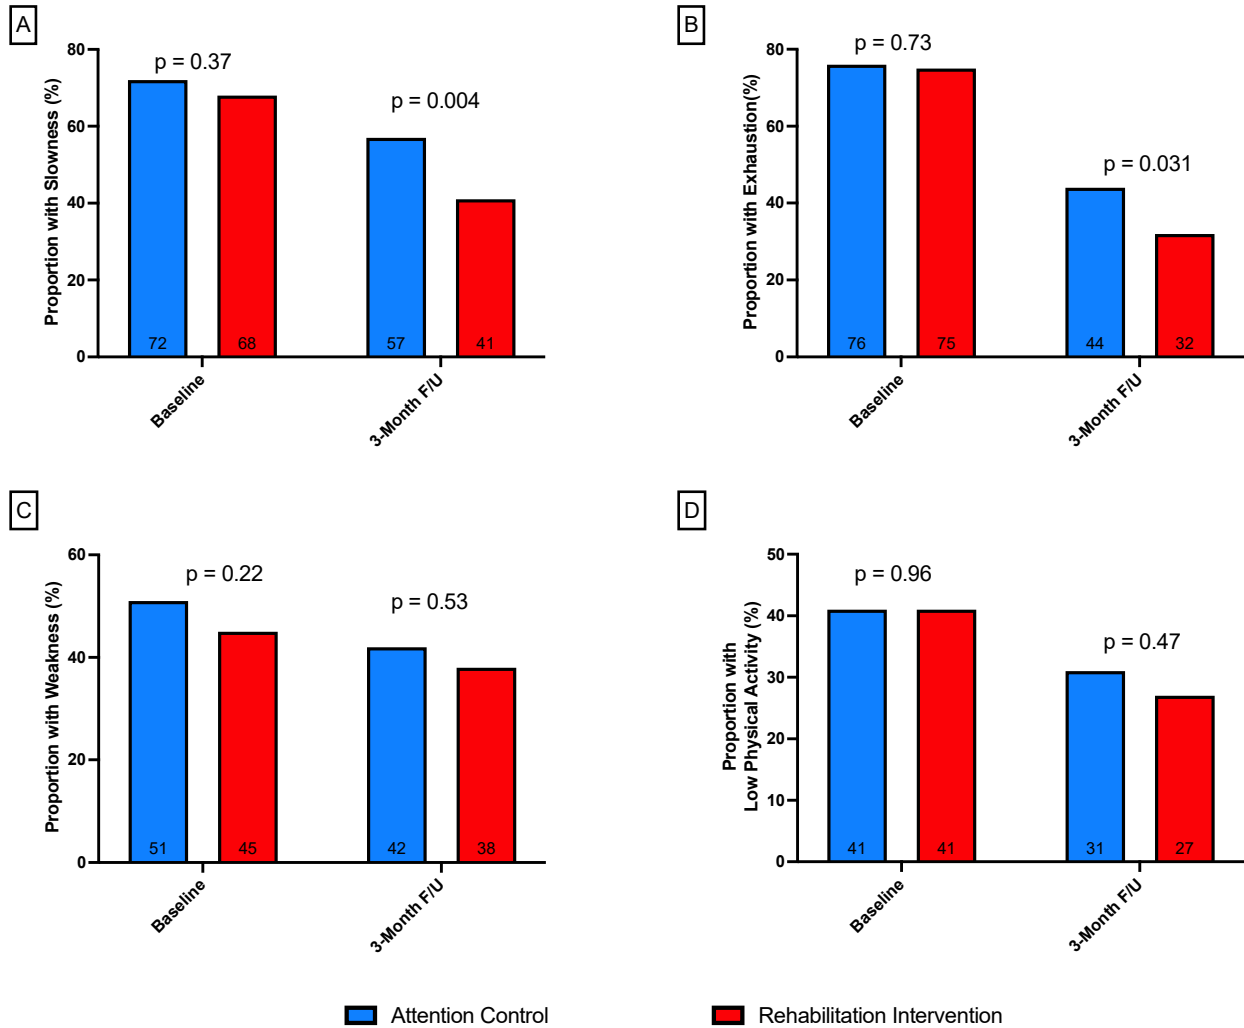

Supplement: jamacardiol-e224903-s003.pdf [file jamacardiol-e224903-s003.pdf]
